1 **Physical contacts between sparse biofilms promote plasmid transfer and**  
2 **generate functional novelty**

3

4 Josep Ramoneda<sup>1,2\*</sup>, Yinyin Ma<sup>1,3</sup>, Julian Schmidt<sup>1</sup>, Michael Manhart<sup>1,4,5</sup>, Daniel C. Angst<sup>4</sup>,  
5 David R. Johnson<sup>1,3,6\*</sup>

6

7

8 **Affiliations:**

9 <sup>1</sup>Department of Environmental Microbiology, Swiss Federal Institute of Aquatic Science and  
10 Technology (Eawag), 8600 Dübendorf, Switzerland

11 <sup>2</sup>Cooperative Institute for Research in Environmental Sciences, University of Colorado, 80309  
12 Boulder, CO, USA

13 <sup>3</sup>Department of Environmental Systems Science, Swiss Federal Institute of Technology (ETH),  
14 8092 Zürich, Switzerland

15 <sup>4</sup>Department of Environmental Systems Science, Institute of Integrative Biology, Swiss  
16 Federal Institute of Technology (ETH), 8092 Zürich, Switzerland

17 <sup>5</sup>Center for Advanced Biotechnology and Medicine and Department of Biochemistry and  
18 Molecular Biology, Rutgers University Robert Wood Johnson Medical School, Piscataway  
19 08854, USA

20 <sup>6</sup>Institute of Ecology and Evolution, University of Bern, 3012 Bern, Switzerland

21

22 **Corresponding authors\*:**

23 Josep Ramoneda, [ramoneda.massague@gmail.com](mailto:ramoneda.massague@gmail.com)

24 David R. Johnson, [david.johnson@eawag.ch](mailto:david.johnson@eawag.ch)

25

26 **Abstract**

27 The horizontal transfer of plasmids is an important driver of microbial evolution, such  
28 as conferring antibiotic resistance (AR) to new genotypes. In biofilms, the abundance  
29 of cell-cell contacts promotes the frequent transfer of plasmids and their associated  
30 genes. In this study, we expand our knowledge about AR-encoding plasmids by  
31 investigating their transfer between discrete biofilms as the biofilms grow and  
32 physically collide with each other. Using an experimental system consisting of two  
33 fluorescently labelled *Pseudomonas stutzeri* strains and an *Escherichia coli* strain, we  
34 show that biofilm collisions promote plasmid transfer along the collision boundaries.  
35 The extent of plasmid transfer depends on the plasmid loss probability, the plasmid  
36 transfer probability, and the relative growth rates of plasmid-free and plasmid-carrying  
37 cells. We further show that the proliferation of plasmids after biofilm collision depends  
38 on the spatial positionings of plasmid-carrying cells along the collision boundary, thus  
39 establishing a link between the large-scale spatial distribution of discrete biofilms and  
40 the small-scale spatial arrangement of cells within individual biofilms. Our study  
41 reveals that plasmid transfer during biofilm collisions is determined by spatial factors  
42 operating at different organizational levels and length scales, expanding our  
43 understanding of the fate of plasmid-encoded traits in microbial communities.

44

## 45 **Introduction**

46 Microbial communities growing across surfaces are pervasive on our planet [1], drive  
47 important biogeochemical cycles [2, 3], and affect human health and disease [4–6].  
48 When embedded in a matrix of extracellular polymeric substances, these so-called  
49 biofilms are involved in a myriad of biotechnological applications such as water  
50 decontamination and biofuel production [7, 8], but also cause persistent infections in  
51 animal tissues and contaminate medical devices [9]. Within biofilms, the close spatial  
52 proximities of individual cells drive multiple processes, among which is the horizontal  
53 transfer of plasmids and their associated genes (i.e., circular pieces of DNA that often  
54 contain functionally important genes such as antibiotic resistance [AR]) [10]. The  
55 processes of plasmid loss (errors in segregation control upon cell division) and  
56 horizontal transfer (conjugation) are the main determinants of plasmid fate and  
57 proliferation within actively growing biofilms [11]. AR-encoding plasmids can cause  
58 persistent AR bacterial populations in human and environmental microbiomes, posing  
59 a serious threat to global health [12, 13]. As biofilms are hotspots for plasmid transfer  
60 [14], it is important to understand how the spatial features of biofilms drive the spread  
61 of AR-encoding plasmids.

62

63 Despite the recognition of biofilms as hotspots for plasmid transfer, the majority of  
64 transfer is postulated to occur along the outer edges of the biofilm matrix [11]. This is  
65 because plasmids generally only invade into and subsequently proliferate within  
66 metabolically active cells, which are usually those cells lying at the outer edges of the  
67 biofilm where unoccupied space and nutrients are plentiful [15]. This expectation has  
68 been confirmed in natural systems such as the mouse gut [16], where transfer occurs  
69 only at the edges of the mucus layer covering epithelial cells. Recent studies on  
70 bacterial communities growing across nutrient-rich agar surfaces, however, show that  
71 plasmid transfer is pervasive within biofilms as long as cells are actively growing (i.e.,  
72 undergoing range expansion, [17, 18]). To better understand plasmid dynamics in  
73 biofilms, it is thus necessary to delineate plasmid transfer occurring within biofilms and  
74 at the biofilm boundaries, and to determine whether plasmid transfer in these  
75 scenarios is driven by the same or different mechanisms.

76

77 In addition to space and nutrient availability, the spatial arrangement of cells across a  
78 surface is another important determinant of plasmid transfer and spread [15, 17, 18].  
79 During biofilm growth and concomitant expansion across surfaces, the component  
80 microbial populations typically spatially segregate from each other as a consequence  
81 of drift at the expansion edge [19]. This process has important effects on biofilm  
82 diversity [20, 21], stability [22], and functioning [23]. Plasmids transfer to greater  
83 extents within communities with highly spatially intermixed populations [18]. This effect  
84 is ascribed to the higher number of cell-cell contacts between plasmid-free and  
85 plasmid-carrying cells, which increases the number of possible plasmid transfer events  
86 [11, 24, 25]. Frequent disturbance is a factor that can promote plasmid invasion by  
87 causing the spatial reorganization of cells and creating new cell-cell contacts in

88 otherwise spatially-segregated populations [15, 26]. However, in a given environment  
89 surfaces are generally not colonized by a single contiguous biofilm but are rather  
90 colonized by multiple spatially segregated biofilms (i.e., sparse biofilms), where each  
91 discrete biofilm lies adjacent to others and dynamically expands and contracts in size  
92 as a consequence of growth and death [27, 28].

93  
94 Despite the implications for the dissemination of AR, there is surprisingly little  
95 information on the processes governing plasmid transfer between adjacent biofilms  
96 [11, 29, 30]. Scenarios where discrete biofilms expand and eventually collide into each  
97 other are likely common in systems such as the gut lumen [31–33] and the dental  
98 plaque [34, 35]. The processes of biofilm expansion, collision, and retraction are more  
99 prominent when periodically exposed to disturbances such as antibiotics, where  
100 antibiotic administration can drastically reduce the population sizes of sensitive  
101 individuals while also exacerbating the subsequent spread of plasmid-encoded AR  
102 during biofilm recovery by imposing a positive selection pressure [36, 37].  
103 Understanding the mechanisms driving AR-plasmid transfer during biofilm collisions  
104 would thus fill a knowledge gap by linking the dynamics within individual biofilms to the  
105 dynamics between biofilms.

106  
107 In this study, we investigated the determinants of the horizontal transfer of AR-  
108 encoding plasmids during biofilm collisions. To accomplish this, we developed a novel  
109 experimental system in which one biofilm, consisting of a pair of fluorescently labelled  
110 strains of the bacterium *Pseudomonas stutzeri* A1501 that carry a conjugative plasmid  
111 pAR145 encoding for chloramphenicol resistance, expands and eventually collides  
112 with an *Escherichia coli* biofilm. We performed biofilm collision experiments by  
113 colliding the two-strain *P. stutzeri* biofilm with the one-strain *E. coli* biofilm, which  
114 allowed us to study both intraspecific (within the two-strain biofilm) and interspecific  
115 (between the two-strain and one-strain biofilms) plasmid transfer in the most simplified  
116 manner. We aimed to 1) quantify the extent of plasmid transfer from the *P. stutzeri*  
117 biofilm (donor biofilm) to the *E. coli* biofilm (recipient biofilm) upon collision, and 2)  
118 determine how the cellular-level organizations of the colliding biofilms affect plasmid  
119 transfer and its subsequent spread. We experimentally identified the determinants of  
120 plasmid transfer to *E. coli* upon biofilm collision and the processes leading to the  
121 subsequent proliferation of these new genotypes within the recipient *E. coli* biofilm.  
122 We further examined the mechanisms by which spatial factors determine the  
123 proliferation of new genotypes after biofilm collision using an individual-based  
124 computational model.

125

## 126 Results

127

### 128 pAR145 dynamics prior to biofilm collision

129 We first quantified pAR145 dynamics within the *P. stutzeri* biofilm prior to collision with  
130 the *E. coli* biofilm. We expected the processes of pAR145 loss and transfer during  
131 expansion of the *P. stutzeri* biofilm alone to have a consequential role on the potential  
132 transfer of pAR145 to the recipient *E. coli* biofilm. We found that pAR145 was purged  
133 from the *P. stutzeri* biofilm within a 300  $\mu\text{m}$  distance corresponding to the radial interval  
134 between 1700-2000  $\mu\text{m}$  (Figs. 1A and 1B), which is an accumulated outcome of  
135 pAR145 loss and preferential growth of pAR145-free individuals in the absence of  
136 chloramphenicol. In our system, this window determines the space and time during  
137 which the transfer of pAR145 to the *E. coli* recipient biofilm will be maximal when  
138 colliding with an adjacent biofilm.

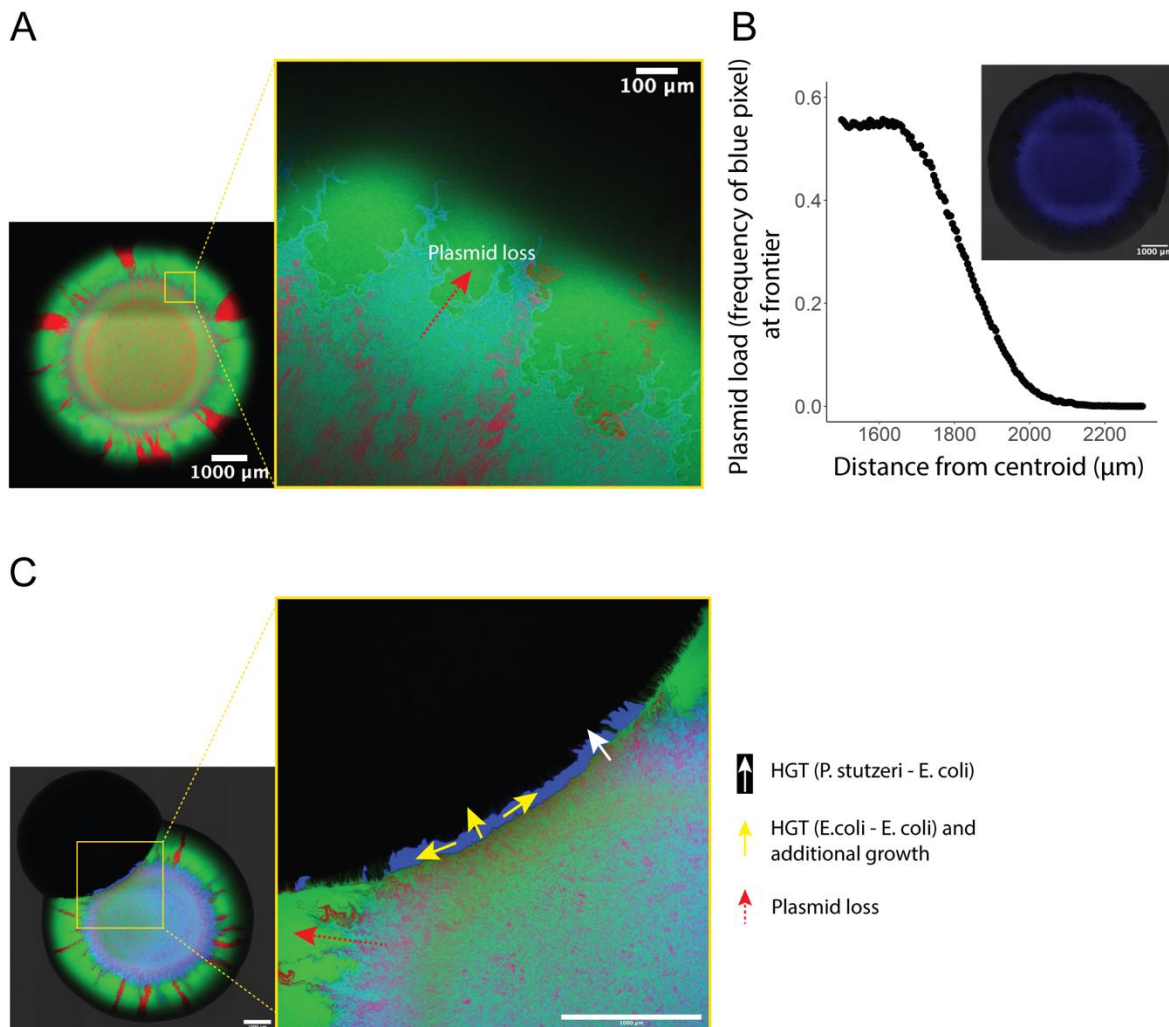

139

140 **Figure 1 Plasmid dynamics in expanding biofilms and transfer into adjacent biofilms**  
141 **upon collision.** A, Representative microscopy image of the *P. stutzeri* biofilm consisting of  
142 two isogenic strains (one expresses red fluorescent protein while the other expresses green  
143 fluorescent protein) that expand together. Initially, the pAR145 donor strain carried pAR145

144 (purple) while the potential recipient did not (green). Note the rapid demixing of the two  
145 genotypes and the formation of discrete sectors. pAR145 transfer can occur between the two  
146 *P. stutzeri* strains, upon which the green strain will turn cyan. The red dashed arrow indicates  
147 a pAR145 loss event and subsequent proliferation of pAR145-free cells. **B**, Quantification of  
148 pAR145 abundance (blue fluorescence signal) during range expansion of the *P. stutzeri* donor  
149 biofilm shown in panel A. **C**, The left panel is a representative microscopy image after physical  
150 collision between the *P. stutzeri* donor and *E. coli* recipient biofilms. Note the formation of a  
151 blue patch located at the collision boundary, which corresponds to *E. coli* cells that acquired  
152 pAR145 via transfer from pAR145-carrying *P. stutzeri* cells. The exposure of the blue channel  
153 has been increased to better visualize the boundaries between plasmid-carrying and -free  
154 cells. The right panel is a magnified image of the collision boundary. White arrow: successful  
155 pAR145 transfer from the *P. stutzeri* donor biofilm to the *E. coli* recipient biofilm. Yellow arrows:  
156 pAR145 transfer and proliferation within the *E. coli* recipient biofilm. Red arrow: pAR145 loss  
157 within the *P. stutzeri* donor biofilm.

158

### 159 **pAR145 transfer between colliding biofilms**

160 We next verified that physical collisions between the *P. stutzeri* donor biofilm and the  
161 *E. coli* recipient biofilm can promote pAR145 transfer into the *E. coli* biofilm. To  
162 accomplish this, we inoculated a 1  $\mu$ L droplet of the donor *P. stutzeri* consortium at ca.  
163 3.0 mm from the recipient *E. coli* biofilm. After 96h of incubation, the *P. stutzeri* donor  
164 and *E. coli* recipient biofilms had physically collided, and a new genotype formed at  
165 the collision boundary (Fig. 1C). This new genotype is the initially non-fluorescent *E.*  
166 *coli* that obtained pAR145 and expresses cyan fluorescent protein upon contact with  
167 the pAR145-carrying *P. stutzeri* biofilm. A closer evaluation of the collision boundary  
168 revealed that the newly formed genotype homogenously extended across an  
169 approximately 2 mm long boundary and protruded ca. 80  $\mu$ m into the *E. coli* biofilm  
170 (Fig. 1C).

171

### 172 **pAR145 loss and initial biofilm positioning determine pAR145 transfer during** 173 **biofilm collisions**

174 After verifying that pAR145 can transfer between biofilms upon their physical collision,  
175 we next investigated the main determinants of this process. We hypothesized that the  
176 initial distance between the *P. stutzeri* donor and *E. coli* recipient biofilms would  
177 determine the extent of pAR145 transfer, where larger distances increase the time for  
178 pAR145 loss prior to biofilm collision and thus reduce pAR145 transfer. To test this  
179 hypothesis, we inoculated the *P. stutzeri* donor and *E. coli* recipient biofilms at  
180 precisely defined distances from each other. We found that collisions between biofilms  
181 initially inoculated at closer distances formed larger amounts of new *E. coli*  
182 transconjugants upon collision (ANOVA  $F_{1,28} = 28.95$ ,  $P = 9.8 \times 10^{-6}$ ,  $n = 5$ ) (Figs. 2A  
183 and 2B). The spatial range in which new *E. coli* transconjugants were formed were  
184 initial distances of 2.7-3.4 mm, although the amount new *E. coli* transconjugants  
185 decreased monotonically within this window (Spearman's rank correlation coefficient  
186 = -0.793;  $P = 8.6 \times 10^{-5}$ ) (Fig. 2B).



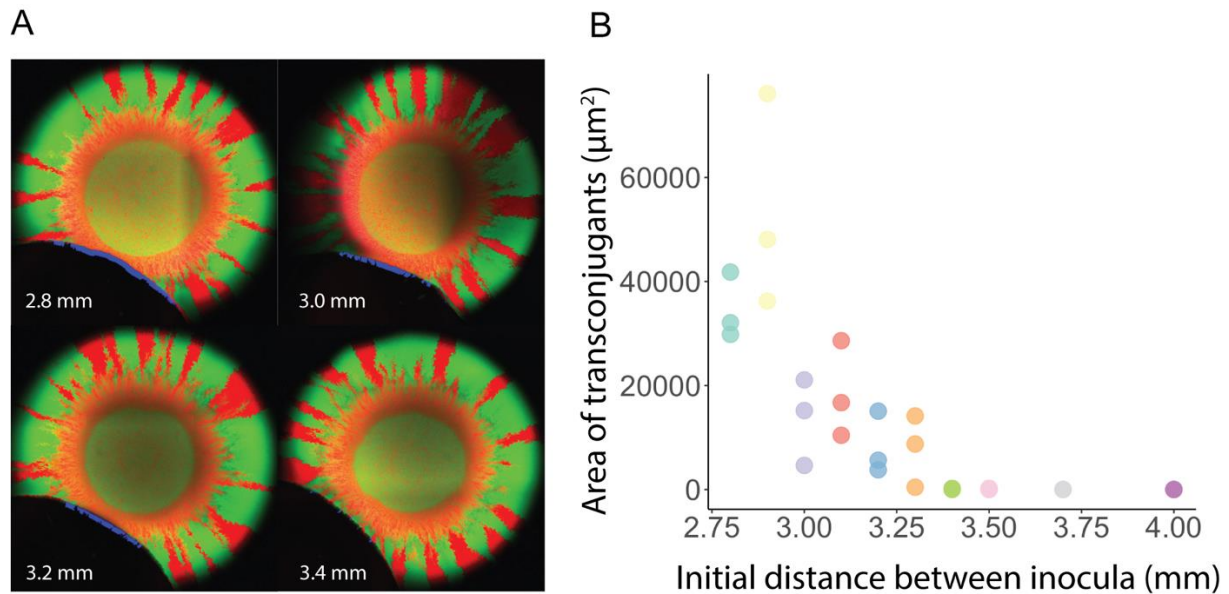

187

188 **Figure 2 Initial distance between biofilms determines the extent of pAR145 transfer**

189 **upon biofilm collision. A,** Representative microscopy images for experimental collisions

190 between *P. stutzeri* donor and *E. coli* recipient biofilms. Numbers indicate the spatial distances

191 between the initial inocula. pAR145 transfer occurs at the collision boundaries and generates

192 blue patches consisting of *E. coli* transconjugants carrying pAR145. Note that due to

193 overexposure of the green and red channels, mixed populations of *P. stutzeri* do not display

194 visible blue signals even when carrying pAR145. In contrast, *E. coli* does not express green

195 or red fluorescent protein and appears blue when carrying pAR145. **B,** Quantification of the

196 absolute area of *E. coli* transconjugants as a function of the distance between the initial

197 inocula. Each datapoint is for an independent biological replicate ( $n = 3$ ) at the specified initial

198 distance (note that some datapoints are overlapping and thus appear as one). As the initial

199 distance between the inocula increases, the area of newly created transconjugants declines.

200

201 **What is the relative contribution of plasmid transfer versus cell proliferation on**

202 **plasmid spread upon collision?**

203 We next sought to recapitulate our findings, quantify the relative contributions of

204 plasmid transfer (HGT) and cell proliferation to the total number of transconjugants,

205 and understand the factors limiting the extent of HGT using an individual-based

206 computational model. We found that the biophysical modelling framework defined in

207 CellModeller [38] (see Materials and Methods) successfully captured the formation of

208 transconjugants within the recipient biofilm upon biofilm collisions (Fig. 3A). Similar to

209 the experimental results, the distance between the initial inocula had a strong impact

210 on plasmid transfer upon collision between the simulated biofilms (Fig. 3A). Both the

211 total number of new transconjugants (ANOVA  $F_{1, 28} = 143.6$ ,  $P = 1.5 \times 10^{-12}$ ,  $n = 5$ )

212 (Fig. 3B) and the number of transfer events from the donor to the recipient biofilm

213 (ANOVA  $F_{1, 28} = 93.9$ ,  $P = 1.9 \times 10^{-10}$ ,  $n = 5$ ) (Fig. 3C) increased significantly at closer

214 distances between the initial inocula.

215

216 Using the modelling framework we tracked the formation of new transconjugants  
217 during biofilm development. We first investigated how the total number of new  
218 transconjugants changed during biofilm development and found a steady increase in  
219 the accumulated number of new transconjugants throughout the simulations (Fig. 3D).  
220 This is largely because plasmid transfer continues to occur between transconjugants  
221 and their ancestral recipients (intraspecific transfer). Therefore, we next evaluated the  
222 number of interspecific transfer events that accumulate along the collision boundary  
223 and found that these events increased significantly from the beginning of biofilm  
224 development but then flattened out as the simulations continued (Fig. 3E). The cause  
225 of this saturation is that successful transfer between two expanding biofilms has  
226 largely saturated at the collision boundary (i.e., there are no longer any remaining cell-  
227 cell contacts between the donor and recipient populations for which plasmid transfer  
228 has not occurred), and thus new transconjugants can no longer be generated.

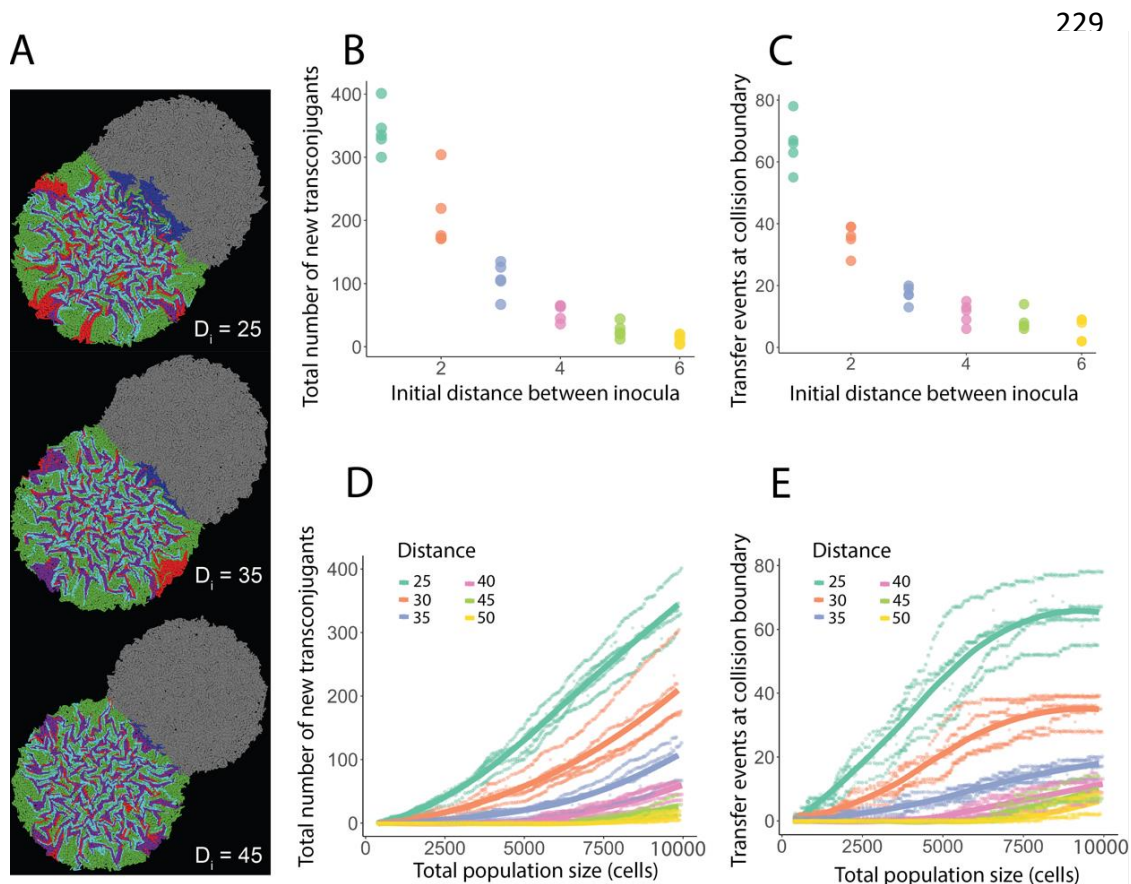

238 **Figure 3 Simulated collisions leading to plasmid transfer and spread between a donor**  
239 **and recipient biofilms expanding at different initial distances. A,** Representative  
240 simulations where the initial inoculum for the donor biofilm consists of a 1:1 mixture of plasmid-  
241 carrying (purple) and plasmid-free (green) cells. Green cells have a 17% growth advantage  
242 over purple cells, which corresponds to the 17% growth rate cost for carrying pAR145 in the  
243 experiments. At each cell division there is a probability of 0.0005 that plasmid carriers will lose  
244 the plasmid due to errors in segregation control. The initial inoculum for the recipient biofilm  
245 consists of a single population of plasmid-free cells (grey) which can receive the plasmid upon  
246 collision with the donor biofilm. Once physical contact occurs, there is a probability of 0.005 at  
247 each time step that the recipient will receive the plasmid and become a transconjugant. If grey  
248 cells receive the plasmid, they will become blue (interspecific transfer). Green cells have an

249 equal probability to acquire plasmids and turn into cyan transconjugants (intraspecific  
250 transfer). White numbers  $D_i$  at the bottom right of the simulation images are the distances  
251 between the initial inocula. The initial number of grey cells inoculated is the same as the initial  
252 total number of green + purple cells. Simulations were performed for 300 time steps until  
253 reaching a final population size of 10000 cells. **B**, Total number of blue transconjugants at the  
254 end of the simulations. Each datapoint is for an independent biological replicate ( $n = 5$ ) (note  
255 that some datapoints are overlapping and thus appear as one). Different colors indicate  
256 different distances between the initial inocula. **C**, Number of transfer events at the collision  
257 boundary quantified at end of the simulations. Transfer events refer to interspecific transfer  
258 between the donor and recipient biofilms. **D**, Total number of blue transconjugants upon  
259 biofilm collision. **E**, Number of interspecific transfer events at the collision boundary as a  
260 function of the total population size. For both panels, each data point is for an independent  
261 simulation ( $n=5$ ) and the solid lines are the running averages. Different colors are for different  
262 initial distances between the initial inocula.

263

### 264 **Spatial intermixing determines plasmid spread after biofilm collision**

265 In addition to the absolute number of plasmid donors along the collision boundary, we  
266 hypothesized that spatial intermixing of different populations along the collision  
267 boundary is also an important determinant of plasmid spread after biofilm collision. As  
268 the distance between the initial inocula increases, we expected plasmid-carrying and  
269 plasmid-free cells to become increasingly spatially segregated due to longer  
270 expansion times (as reported in [17, 18]), and lead to less efficient plasmid transfer  
271 both between biofilms and within the recipient biofilm upon collision. We tested two  
272 potential effects associated with the spatial intermixing of plasmid-carrying and  
273 plasmid-free cells that can modulate the extent of plasmid spread into an adjacent  
274 biofilm. First, we considered the effects of spatial intermixing of plasmid-carrying and  
275 -free cells in the donor biofilm on the total plasmid load at the collision boundary.  
276 Spatial intermixing determines the total number of plasmids that can be potentially  
277 transferred upon collision with an adjacent plasmid-free biofilm by modulating the  
278 efficiency of HGT (Fig. 4AB). To test this effect, we allowed for HGT to happen within  
279 the donor biofilm and from donor to recipient, but not within the recipient biofilm.  
280 Second, we considered the effects of spatial intermixing of plasmid-carrying and -free  
281 populations in the donor biofilm at the collision boundary on the intermixing of new  
282 transconjugants (blue cells) and plasmid-free cells (grey cells) in the recipient biofilm.  
283 Spatial features of the donor biofilm are acquired by the recipient biofilm upon collision  
284 and drive plasmid spread within the recipient biofilm by again modulating the efficiency  
285 of HGT (Fig. 4AC). To test this effect, we allowed for HGT to happen between the  
286 donor biofilm and the recipient biofilm, and within the recipient biofilm, but not within  
287 the donor biofilm.



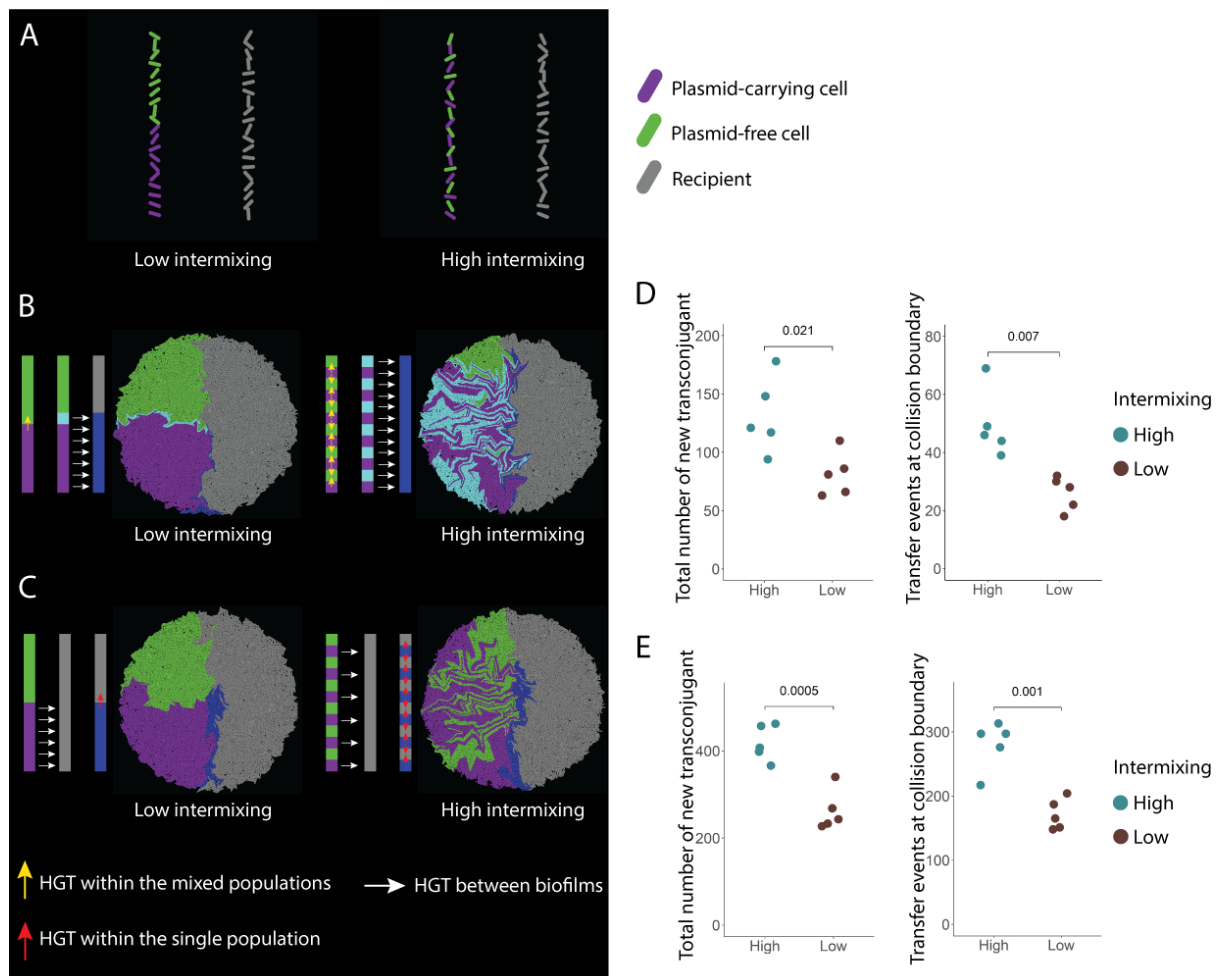

288

289 **Figure 4 Effects of the spatial intermixing of plasmid carriers and plasmid-free**  
 290 **individuals in the donor biofilm on subsequent plasmid spread in the recipient biofilm.**

291 **A**, Initial positioning of cells along a simulated collision boundary. Plasmid-carrying cells  
 292 (purple) and plasmid-free cells (green) within the donor biofilm are positioned either in two  
 293 discrete patches or are highly intermixed. Grey cells are the potential recipients within the  
 294 recipient biofilm. Cells are all randomly rotationally oriented along the x-y plane. **B**, Schematic  
 295 figures of the potential effects on the left and the simulations on the right. Blue cells indicate  
 296 the newly created transconjugants in the recipient biofilm. Simulations tested the effects of  
 297 intermixing within the donor biofilm on plasmid load at the collision boundary and on  
 298 subsequent plasmid spread within the recipient biofilm. To simulate these effects, we only  
 299 enabled plasmid transfer within the donor biofilm (mixed populations of purple and green)  
 300 indicated by vertical yellow arrows, and between biofilms indicated by horizontal white arrows.  
 301 **C**, Simulations testing the effects of intermixing within the donor biofilm on consequent  
 302 intermixing within the recipient biofilm and further plasmid spread within the recipient biofilm.  
 303 Blue cells indicate the newly created transconjugants in the recipient biofilm. To simulate these  
 304 effects, we only enabled plasmid transfer between biofilms indicated by the horizontal white  
 305 arrows, and within the recipient biofilm (grey cells) indicated by the vertical red arrows. **D**, **E**,  
 306 Quantification of the total number of new transconjugants formed in the recipient biofilm (blue)  
 307 and the total number of plasmid transfer events that occurred at the collision boundary under  
 308 the simulation condition shown in **B**, **C**, respectively. Simulation images correspond to the final

309 time step at 7000 total cells. P-values from Welch two-sample t-tests are shown on top of  
310 panels D and E.

311 We used our individual-based modelling framework to simulate the collision boundary  
312 as two “cell walls”, where one cell wall contains mixed populations consisting of  
313 plasmid-carrying cells (purple cells) and plasmid-free cells (green cells), and the other  
314 cell wall consists of one single plasmid-free population (grey cells) (Fig. 4A). We varied  
315 the initial intermixing of the mixed populations by either placing two cell types (purple  
316 and green) into two discrete patches (low intermixing), or by sequentially placing one  
317 cell type next to the other (high intermixing) (Fig. 4A). Compared to initiating cell  
318 inocula as in Fig. 3, initiating two cell walls allowed us to precisely control the spatial  
319 intermixing upon collision and investigate mechanisms occurring right at the collision  
320 boundary. We found that in collisions where plasmid-carrying individuals (purple) are  
321 highly intermixed with plasmid-free (green) individuals in the donor biofilm, most of the  
322 plasmid-free cells (green) become plasmid-carrying cells (cyan) due to intraspecific  
323 transfer, increasing the maximal plasmid load at the collision boundary (Fig. 4B). We  
324 also found that, for the highly intermixed scenario, both the total number of new  
325 transconjugants (blue) and the number of plasmid transfer events at the collision  
326 boundary were higher than in the low-intermixed scenario (two-sample two-sided  
327 Welch test;  $P = 0.021$ ,  $P = 0.007$ ,  $n = 5$ ) (Fig. 4D). Next, we tested the effects of  
328 intermixing of purple and green cells on the intermixing of new transconjugants (blue)  
329 and recipient cells (grey) in the recipient biofilm, and further effects on plasmid spread  
330 within the recipient biofilm (Fig. 4C). We again found that in collisions where plasmid  
331 donors (purple) are highly intermixed with plasmid-free (green) individuals, both the  
332 total number of new transconjugants (blue) and the number of plasmid transfer events  
333 at the collision boundary are higher (two-sample two-sided Welch test;  $P = 0.0005$ ,  $P$   
334  $= 0.001$ ,  $n = 5$ ) (Fig. 4E). We then quantified the number of plasmid transfer events  
335 that occurred within the recipient biofilm and found that there were significantly more  
336 transfer events for highly spatially intermixed conditions ( $138 \pm 21$ ) compared to poorly  
337 spatially intermixed conditions ( $91 \pm 28$ ) (two-sample two-sided Welch test;  $P = 0.018$ ,  
338  $n = 5$ ). Indeed, over one-third of plasmid spread within the recipient colony was due to  
339 plasmid transfer events between cells of the same strain ( $33.7 \pm 5.1\%$ ).

340

341

## 342 Discussion

343

344 Linking the determinants of plasmid transfer within and between spatially structured  
345 microbial communities is of paramount interest for predicting the spread of antibiotic  
346 resistance (AR) and other plasmid-encoded traits in sparse biofilms. In this study, we  
347 showed that plasmid-encoded AR can readily transfer between spatially separate  
348 biofilms upon their expansion and physical collision (Fig. 1C). The new plasmid-  
349 carrying genotype is formed immediately after collision, with the potential to further  
350 transfer the plasmid into adjacent plasmid-free regions. We revealed that the initial  
351 distance between expanding biofilms and the plasmid load dynamics during biofilm  
352 expansion determine the spread of the AR-encoding plasmid into the recipient biofilm  
353 (Figs. 2 and 3). Our findings also highlight spatial intermixing between plasmid-  
354 carrying and plasmid-free individuals as a key driver of plasmid-mediated AR spread  
355 between biofilms (Fig. 4).

356

357 In the absence of antibiotic selection, there is a period during which plasmid loss upon  
358 cell division and selection for plasmid-free cells decreases the opportunities for  
359 plasmid transfer into adjacent biofilms. This is evident as a decaying relationship  
360 between the extent of new transconjugants in the recipient biofilm and the distance  
361 between biofilm inocula (Fig. 2B). The segregation control system of a particular  
362 plasmid will have a large impact on its temporal persistence in a given biofilm [39, 40],  
363 and the relative cost of the plasmid will also determine how rapidly plasmid-free cells  
364 dominate the expansion frontier due to increased relative fitness [41]. There are many  
365 cases in which plasmids are able to persist within the host strain even in the absence  
366 of a positive selection pressure due to compensatory mutations that eliminate the  
367 costs of plasmid carriage [42, 43]. In such situations we expect transfer to be  
368 independent of the initial distance between biofilms provided these enter in physical  
369 contact. This means that the taxonomic composition of the biofilm and the biology of  
370 the AR-encoding plasmids will have a large impact on plasmid spread between  
371 adjacent biofilms [44].

372

373 We found that the spatial intermixing of plasmid-carrying and plasmid-free cells at the  
374 expansion frontier of a donor biofilm affects both the total plasmid load and the degree  
375 of intermixing of the plasmid-free and plasmid-carrying individuals in the recipient  
376 biofilm. More intermixed populations lead to a larger number of cell-cell contacts  
377 between phenotypically distinct types (in this case antibiotic resistant and sensitive  
378 individuals). For a contact-dependent process such as plasmid conjugation, this leads  
379 to a larger number of possible non-redundant transfer events (i.e., transfer events from  
380 plasmid donor to potential recipient cells as opposed to transfer events from plasmid  
381 donor to adjacent plasmid donor cells), which results in a larger plasmid spread [18].  
382 This explains why we observed a linear increase in the number of new transconjugants  
383 after biofilm collision (Fig. 3D), but a plateau in the number of new transconjugants  
384 being formed at the collision boundary (Fig. 3E), because after all potential donor-

385 recipient cell contacts at the collision boundary were realized there were no more  
386 targets for additional plasmid transfer.

387

388 In the light of our findings, in natural systems such as the human gut, processes  
389 leading to higher spatial intermixing between populations are expected to increase  
390 plasmid spread. For example, in the mouse gut, the spread of AR-encoding plasmids  
391 is maximized with the frequent contact of persisting plasmid donors with invading  
392 plasmid-free enteric pathogens [45, 46]. Frequent physical disturbances increase the  
393 number of new donor-recipient contacts by reshuffling the spatial positioning of cells  
394 and promote widespread plasmid transfer [15]. Upon physical contact between  
395 biofilms, however, we confirmed both experimentally and theoretically previous work  
396 that suggested transfer only occurs at biofilm boundaries [11], as shown by the narrow  
397 extent of the new *E. coli* transconjugants at the collision boundary. Seoane et al. [47]  
398 reported similar results, where there was plasmid transfer between small cell colonies,  
399 but plasmid invasion was limited by the inactivity of cells and the physical compression  
400 towards the colony center. This localized transfer can still be very relevant for the  
401 maintenance of unstable plasmids in habitats where disturbances or environmental  
402 gradients promote the dispersal and regrowth of spatially structured biofilms  
403 associated for example to the mammalian gut, plant structures, or surfaces in aquatic  
404 environments (e.g. for gradients in oxygen concentrations; [48]).

405

406 This link between intra- and inter-biofilm dynamics sets a basis for understanding  
407 antibiotic resistance spread at the metacommunity level, which better resembles  
408 processes occurring in natural systems such as sparse biofilms (Fig. 5). The  
409 persistence of AR in microbial communities even in the absence of antibiotic pressure  
410 could be explained by spatial factors such as the spatial intermixing between cells that  
411 operate both within and between biofilms. In spatially structured systems such as the  
412 gut lumen or the dental plaque, this conceptualization might be of interest because  
413 the spread of plasmid-encoded AR could be modelled based on pre-existing models  
414 from metacommunity theory [49, 50]. Source-sink dynamics are a way by which a  
415 stable plasmid donor ensures the plasmid is maintained in unstable plasmid recipients  
416 by frequent HGT [51]. Our study suggests that depending on the physical proximity  
417 between biofilm sources and sinks of plasmid transfer, frequent collisions can lead to  
418 the maintenance of plasmids via HGT even when the plasmid is unstable in all  
419 community members [51, 52]. This implies that in a metacommunity context the entire  
420 metacommunity will have access to the plasmid under source-sink dynamics provided  
421 there is frequent physical contact between biofilms.

422

423

424



## Plasmid-based metacommunity

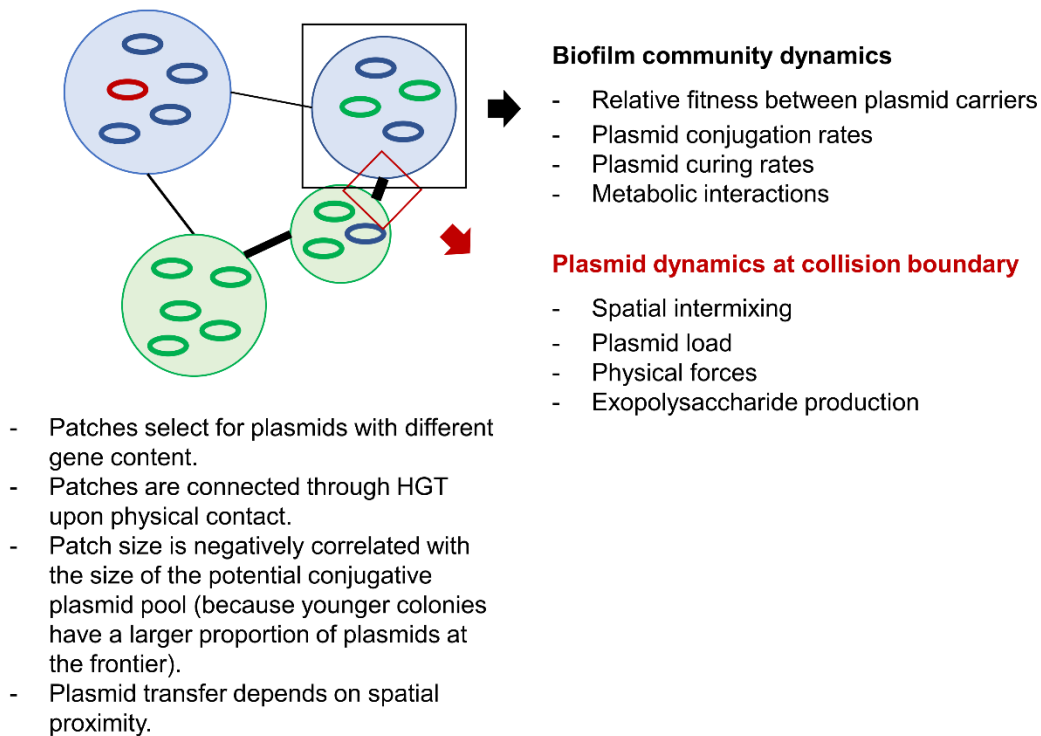

425 **Figure 5 General framework of plasmid spread across a biofilm metacommunity.** The  
426 scheme summarizes the processes driving the spread of plasmids in spatially structured  
427 microbial communities. The width of the lines connecting the communities indicates the  
428 magnitude of dispersal of genotypes or plasmids between them. The graph separates the  
429 mechanisms that drive plasmid transfer within the communities and at the collision boundaries  
430 between them. The spread of plasmid-encoded AR or other traits depends on the load of  
431 antibiotic resistance genes and spatial intermixing at the expansion frontier of the colliding  
432 biofilms. These respond to multiple processes intrinsic to the dynamics within each of the  
433 communities. However, at the collision boundary other forces play an important role because  
434 these determine whether the potential horizontal gene transfer can physically occur.

435

436

437 The relative simplicity of our experimental system and modelling approach also has  
438 several limitations. Our simplified consortia might not reflect the complex interactions  
439 and relative growth differences within complex biofilms. However, the processes we  
440 describe here should hold, as different genotypes will persist at the expansion frontier  
441 and be susceptible to plasmid transfer. Second, we have not tested the dependency  
442 of plasmid transfer on the community composition of the adjacent colliding biofilms.  
443 Some taxa are known to produce a thick layer of exopolysaccharides that can prevent  
444 cell-cell contacts even when there are compressive physical forces at play [53]. Also,  
445 some taxa might not have compatible conjugation machineries to establish pili  
446 junctions required for effective transfer [54], while some biofilms will prevent collisions  
447 in the first place via chemical signaling [55]. The generalizability of our findings could

448 be confirmed with studies that implement our simplified experimental system using  
449 diverse sets of strains from multiple taxonomic groups and traits. There are also  
450 multiple factors we could not address that will determine the extent of this spread into  
451 the recipient biofilm. First, physical forces might push new transconjugants towards  
452 the collision boundary, uplifting them and creating a vertical rather than a horizontal  
453 expansion [49]. Second, the metabolic state of cells closer to the center of the biofilm  
454 will also determine their ability to capture and transfer the plasmid. Here nutrient  
455 availability, interspecies interactions, and abiotic stressors might play an important role  
456 at determining such cellular activity. Third, the presence of even subinhibitory  
457 concentrations of the antibiotic, to which a plasmid confers resistance, can create a  
458 positive selective pressure that promotes further transfer.

459  
460 We believe our results provide proof of principle and support for an expanded  
461 framework of plasmid-mediated antibiotic resistance spread in spatially structured  
462 microbial landscapes. Future research should test the influence of subinhibitory  
463 antibiotic pressure and nutrient availability in experimental systems using more  
464 taxonomically diverse biofilms. Furthermore, *in vivo* imaging of actual biofilm collisions  
465 would provide quantitative information about the frequency and extent of antibiotic  
466 resistance spread via plasmid conjugation between adjacent biofilms under clinically  
467 and environmentally relevant conditions.

468  
469  
470  
471

## 472 **Materials and methods**

### 473 *Bacterial strains and plasmid*

474 The initial consortium carrying antibiotic resistance consisted of two genetically  
475 engineered mutants of the bacterium *Pseudomonas stutzeri* A1501, whose genetic  
476 modifications and growth traits have been previously described [56, 57]. Each strain  
477 is genetically identical to the other except for containing a different isopropyl  $\beta$ -D-1-  
478 thiogalactopyranoside (IPTG)-inducible fluorescent protein-encoding gene located on  
479 the chromosome (*egfp* encoding for green fluorescent protein or *echerry* encoding for  
480 red fluorescent protein (Supplementary Table 1), which enables us to distinguish and  
481 quantify the different strains when grown together. The methods used to construct the  
482 strains have been described in detail elsewhere [57]. The strain carrying the *echerry*  
483 gene was initially transformed with the R388-derivative plasmid pAR145  
484 (pSU2007 *aph::cat*-P<sub>A1/04/03</sub>-*cfp*\*-T<sub>0</sub>, described in [58]). Plasmid pAR145 encodes for  
485 chloramphenicol resistance and is marked with an IPTG-inducible *ecfp* gene  
486 (encoding for cyan fluorescent protein). The potential recipient strain was *E. coli* DH5 $\alpha$   
487 [F2 *supE44 lacU169 (w80lacZDM15) hsdR17 recA1 endA1 gyrA96thi-1 r elA1*] [59].  
488

### 489 *Biofilm collision experiments*

490 We performed biofilm collision experiments where we inoculated a mixture of the *P.*  
491 *stutzeri* strains and the *E. coli* DH5 $\alpha$  strain as single droplets onto agar plates and  
492 allowed them to grow into colonies (biofilms) until collision. We initially grew all the  
493 strains separately in oxic liquid lysogeny broth (LB) medium overnight at 37°C and  
494 equalized their optical densities at 600nm (OD<sub>600</sub>) to 2. We next mixed the two *P.*  
495 *stutzeri* strains to a fixed 1:1 ratio (vol:vol). The *echerry*-marked donor strain contained  
496 pAR145, which encodes for *ecfp*, and thus displayed the composite color purple (red  
497 and blue). The *egfp*-marked potential recipient strain only displayed the color green.  
498 Using a Tecan Evo 200 liquid handling system (Tecan, Männedorf, Zurich,  
499 Switzerland), we then deposited pairs of droplets of the *P. stutzeri* mixture and the *E.*  
500 *coli* strain (1  $\mu$ l of each culture) at four discrete spatial positions on each LB agar plate  
501 adjusted to a pH of 7.5 and amended with 1 mM IPTG. We programmed the liquid  
502 handling system to deposit the *P. stutzeri* mixture and *E. coli* droplets at distances  
503 between droplet centroids of 2.80, 2.90, 3.00, 3.10, 3.20, 3.30, 3.40, 3.50, 3.70, and  
504 4.00 mm with 3 replicates per distance. We finally incubated the plates for 96h under  
505 room temperature in oxic conditions.

506

### 507 *Bacterial colony imaging and quantitative image analysis*

508 We imaged the colonies immediately upon completion of the incubation period using  
509 a Leica TC5 SP5 II confocal microscope (Leica Microsystems, Wetzlar, Germany) with  
510 objectives 10x/0.3na (dry) and 63 x/1.4na (oil) (Etzlar, Germany). We scanned the  
511 entire biofilms (*P. stutzeri* mixture and *E. coli*) by stitching together multiple frames of  
512 1024 x 1024 pixels. We set the laser emissions to 514 nm for the excitation of the red

513 fluorescent protein, 488 nm for the excitation of the green fluorescent protein, and 458  
514 nm for the excitation of the cyan fluorescent protein. We analyzed the images in  
515 ImageJ (<https://imagej.nih.gov/ij/>) using FIJI plugins (v. 2.1.0/1.53c; <https://fiji.sc>).

516

517 We quantified plasmid dosage (i.e., the extent cyan fluorescent protein-expressing  
518 cells) using the “Sholl analysis” plugin [60] on the binarized image of the blue channel  
519 after application of a noise-reduction threshold of 20 pixels. The “Sholl analysis”  
520 calculated the number of blue pixels at 10  $\mu\text{m}$  radial increments from the centroid to  
521 the colony edge. We initiated the analysis at 1500 microns from the colony centroid  
522 because fluorescent signals at smaller radii could not be precisely resolved by image  
523 analysis. We then applied the “Area to line” function of the “Overlay” plugin to register  
524 the number of blue pixels (here coded as 255 because pixel intensity was not the main  
525 target) and background (coded as 0) for the areas corresponding to each 10  $\mu\text{m}$  radial  
526 increment. We defined plasmid dosage as the total number of blue pixels divided by  
527 the total number of pixels along each radius. We performed all downstream analyses  
528 in R Studio (v1.3.1073, <https://www.rstudio.com>).

529

530 *Individual-based modelling of antibiotic resistance spread between microbial*  
531 *communities on surfaces*

532 We performed individual-based computational modelling of microbial range  
533 expansions using CellModeller 4.3, which is a computational framework designed to  
534 physically and chemically simulate rod-shaped cells with user-defined rules [38]. We  
535 modelled individual rod-shaped cells as three-dimensional capsules (i.e., cylinders  
536 with hemispherical ends), where capsules grow by extending their length and  
537 experience frictional drag that stops them from growing into one another. We used the  
538 default setting for the parameter that controls frictional drag ( $\gamma = 10$ ). As cells  
539 grow, they add a constant volume until reaching a critical size defined by default  
540 settings where they then divide into two daughter cells. Meanwhile, cells have limited  
541 potential of shoving due to physical forces that limit the displacement of cells upon  
542 division. In CellModeller, cells are abstracted as computational objects referred to as  
543 a cellState (cs) that contain all the information regarding an individual cell, including  
544 its spatial position ( $\text{pos}[x, y, z]$ ), rotational orientation ( $\text{dir}[x, y, z]$ ), cell length (len),  
545 growth rate (growthRate), and cell type (cellType). The cell-type is an arbitrary label  
546 that allows us to simulate different cellular behaviors.

547

548 In CellModeller, individual cells are modelled as cylinders of length  $l$  capped with  
549 hemispheres that result in a capsule shape, with both hemispheres and the cylinder  
550 having a radius  $r$ . At each simulation step, a cell increases in length based on its  
551 growth rate parameter, which is physically constrained by the other cells in its physical  
552 proximity. In this work, we initiated cells to have  $r = 0.04$  and  $l = 2$  and set cells to  
553 divide when their length reaches the critical division length  $l_{div}$  with the following  
554 equation:

555



$$l_{div} = l_0 + G(\Delta, \sigma)$$

556  
557 where  $l_0$  is the initial cell length at birth and  $G$  is a random gaussian distribution with  
558 mean  $\Delta = 2$  and standard deviation  $\sigma = 0.45$ . Therefore, when a cell divides, the two  
559 daughter cells are initiated with  $l_{div} / 2$  and a new target division length is assigned to  
560 each daughter cell calculated from the equation above. The addition of constant mass  
561 has been found to accurately model bacterial division while maintaining cell size  
562 homeostasis as described elsewhere [61].  
563

564  
565 We extended our model to incorporate plasmid transfer and plasmid loss. As part of  
566 the biophysics in CellModeller, physical contacts between cells are recorded at each  
567 step to minimize any overlap between cells. We altered the code such that each cell  
568 kept track of their contacts, which allowed us to model plasmid transfer when cells  
569 were in contact. We activated this function by setting the argument  
570 'compNeighbours=True' when initiating the biophysical model. For the simulations in  
571 Fig. 3, we initially positioned three cell types – green plasmid-free cells (cellType 0),  
572 purple plasmid-carrying cells (cellType 1) and grey plasmid-free cells (cellType 2) by  
573 loading 394 cells in total (101 green cells, 96 purple cells, and 197 uncolored cells)  
574 across the grid with a uniform distance of 5 units between cells along the x and y axes.  
575 We loaded green, purple, and uncolored cells according to the checkerboard  
576 arrangement within a circle of radius 40 units. Initially, we set the origin of one “colony”  
577 at coordinate (-25, -25) and the other at (25, 25). In order to allow two “colonies” to  
578 collide at a later time, we adjusted the distance between the two by increasing the  
579 absolute value of the x- and y-axes to ( $\pm 30, \pm 30$ ), ( $\pm 35, \pm 35$ ) and ( $\pm 40, \pm 40$ ). We loaded  
580 all the cells with the z coordinate set to 0. Thus, we constrained their orientations and  
581 dynamics to the x, y plane. We tested different plasmid transfer and loss probabilities  
582 and selected a plasmid loss probability  $P_l = 0.0005$  and a plasmid conjugation  
583 probability  $P_c = 0.005$  to capture important features from the experimental results (Fig.  
584 2A). We set the growth rate of green cells, purple cells and grey cells to 1, 0.83 and  
585 0.8, respectively, such that the relative growth rates were consistent with our  
586 experimental measurements. For the simulations in Fig. 4, we kept most of the primary  
587 settings from those used for the simulations in Fig. 3 but we removed the plasmid loss  
588 process. We kept all cellTypes growing at the same rate 1) because the length and  
589 time scales are small when simulating collision boundaries, and 2) to isolate the effects  
590 of spatial positioning from differential growth rates.  
591

### 592 *Quantification of pAR145 transfer and loss rates*

593 We estimated pAR145 transfer (conjugation) rates between all experimental strains  
594 by growing three pairs of pAR145 donor and potential recipient strains (purple with  
595 green, purple with recipient *E. coli*, and transconjugant *E. coli* with recipient *E. coli*) on  
596 filters with a pore size of 0.22  $\mu\text{m}$  (Merck Millipore) for 24 hours at room temperature.  
597 We started the donor and recipient cultures independently and then adjusted each  
598 culture to  $\text{OD}_{600} = 2$  using 0.89% (w/v) sodium chloride solution and mixed them at a

599 ratio of 1:1 v/v. We then evenly spread the 50  $\mu\text{L}$  mixtures onto filters applied directly  
600 to the surfaces of agar plates, where the filters increase physical contacts between  
601 cells. After 24 hours of incubation at room temperature, we washed off the cells from  
602 the filters using phosphate-buffered saline (PBS). We then quantified the number of  
603 new transconjugants by serially diluting the PBS solution, spreading it onto LB agar  
604 plates supplemented with 25  $\mu\text{g mL}^{-1}$  chloramphenicol and the corresponding selective  
605 antibiotic (50  $\mu\text{g mL}^{-1}$  gentamycin for *P. stutzeri*, 25  $\mu\text{g mL}^{-1}$  nalidixic acid for *E. coli*  
606 DH5 $\alpha$ ), and incubating the plates at 37°C for 24h. We then counted the number of  
607 chloramphenicol resistant colonies and estimated transfer rates as the ratio of new  
608 transconjugants to the total number of pAR145 carriers and pAR145-free individuals  
609 as described in [62].

610  
611 We estimated pAR145 loss probabilities by growing pAR145-carrying strains in a  
612 shaking 96-well plate reader using an Eon™ Microplate Spectrophotometer with high  
613 performance microplate-based absorbance readings. We followed the methods  
614 described in [63] to screen for colonies that lost pAR145 after three hours of growth at  
615 37 °C. We kept the growth duration short because plasmid loss probabilities are  
616 commonly measured by quantifying the accumulation of plasmid-free cells over time,  
617 which consists of both plasmid loss events and the subsequent growth of plasmid-free  
618 cells. Therefore, we minimized subsequent growth by shortening the incubation time.  
619 Next, we spread 50  $\mu\text{L}$  of a pAR145-carrying culture that was grown and adjusted as  
620 described above for estimating pAR145 transfer probabilities. After 24h of incubation  
621 at 37°C, we counted the number of colonies with and without pAR145 and estimated  
622 the pAR145 loss probabilities as the ratio of pAR145-free to pAR145-carrying  
623 individuals.

624

#### 625 *Quantification of relative growth rates between pAR145-carrying and -free strains*

626 We estimated the relative growth rates between pAR145-carrying and -free strains  
627 using a colony collision method based on colony geometry described in [64]. We used  
628 the pipetting robot to place two 1  $\mu\text{L}$  droplets (one droplet for each strain tested) 3 mm  
629 apart from each other on an LB agar plate, where the cell density of each droplet was  
630 set to  $\text{OD}_{600} = 2$ . We next incubated the LB agar plates under room temperature for  
631 96h to allow the droplets to form colonies and for the colonies to collide into each other.  
632 We then used the geometric approach described in [64] to estimate the relative growth  
633 rates of the strains based on the arc of the collision boundary between the two  
634 corresponding colonies. Briefly, the formula we used is:

635

$$636 \quad R_b = l \frac{v_1 v_2}{|v_1^2 - v_2^2|} = l \frac{1 + s}{s(2 + s)}$$

637

638 where  $l$  is the distance between two colonies;  $s$  is the selective advantage or cost that  
639 pAR145 confers;  $v_1$  is the expansion velocity of the pAR145-free colony (faster  
640 velocity);  $v_2$  is the expansion velocity of the pAR145-carrying colony (slower velocity);

641  $R_b$  is the radius of the circle generated by the arc at the boundary. Measurements of  
642  $R_b$  and  $l$  are sufficient to derive  $s$ . We quantified  $R_b$  and  $l$  for 4 replicates using Adobe  
643 Illustrator 2022 where we manually drew lines and circles to extract the values. While  
644 the image scale can differ among replicates,  $R_b$  and  $l$  are proportional in one image  
645 and  $s$  will therefore not be affected.

646

647

## 648 **Acknowledgments**

649 We thank Dr. María Pilar Garcillán-Barcia (University of Cantabria) for providing  
650 plasmid pAR145 and *E. coli* DH5 $\alpha$ . J.R. acknowledges funding from the Swiss National  
651 Science Foundation (Early Postdoc Mobility grant: P2EZP3\_199849). M.M.  
652 acknowledges funding from the Swiss National Science Foundation (Ambizione grant:  
653 PZ00P3\_180147).

654

## 655 References

- 656 1. Hall-Stoodley L, Costerton JW, Stoodley P. Bacterial biofilms: from the Natural  
657 environment to infectious diseases. *Nat Rev Microbiol* 2004; **2**: 95–108.
- 658 2. Zhao M, Xue K, Wang F, Liu S, Bai S, Sun B, et al. Microbial mediation of  
659 biogeochemical cycles revealed by simulation of global changes with soil  
660 transplant and cropping. *ISME J* 2014; **8**: 2045–2055.
- 661 3. Madsen EL. Microorganisms and their roles in fundamental biogeochemical  
662 cycles. *Curr Opin Biotechnol* 2011; **22**: 456–464.
- 663 4. Stoodley P, Sauer K, Davies DG, Costerton JW. Biofilms as complex  
664 differentiated communities. *Ann Rev Microbiol* 2003; **56**: 187–209.
- 665 5. Hou K, Wu ZX, Chen XY, Wang JQ, Zhang D, Xiao C, et al. Microbiota in  
666 health and diseases. *Signal Transduct Target Ther* 2022; **7**: 1–28.
- 667 6. Ogunrinola GA, Oyewale JO, Oshamika OO, Olasehinde GI. The human  
668 microbiome and its impacts on health. *Int J Microbiol* 2020; **2020**: 8045646.
- 669 7. Berlanga M, Guerrero R. Living together in biofilms: The microbial cell factory  
670 and its biotechnological implications. *Microb Cell Fact* 2016; **15**: 1–11.
- 671 8. Halan B, Buehler K, Schmid A. Biofilms as living catalysts in continuous  
672 chemical syntheses. *Trends Biotechnol* 2012; **30**: 453–465.
- 673 9. Khatoon Z, McTiernan CD, Suuronen EJ, Mah TF, Alarcon EI. Bacterial biofilm  
674 formation on implantable devices and approaches to its treatment and  
675 prevention. *Heliyon* 2018; **4**: e01067.
- 676 10. Bowler P, Murphy C, Wolcott R. Biofilm exacerbates antibiotic resistance: Is  
677 this a current oversight in antimicrobial stewardship? *Antimicrob Resist Infect*  
678 *Control* 2020; **9**: 1–5.
- 679 11. Stalder T, Top E. Plasmid transfer in biofilms: a perspective on limitations and  
680 opportunities. *npj Biofilms Microbiomes* 2016; **2**: 1–5.
- 681 12. Jiang Q, Feng M, Ye C, Yu X. Effects and relevant mechanisms of non-  
682 antibiotic factors on the horizontal transfer of antibiotic resistance genes in  
683 water environments: A review. *Sci Total Environ* 2022; **806**: 150568.
- 684 13. Lerminiaux NA, Cameron ADS. Horizontal transfer of antibiotic resistance  
685 genes in clinical environments. *Can J Microbiol* 2019; **65**: 34–44.
- 686 14. Balcázar JL, Subirats J, Borrego CM. The role of biofilms as environmental  
687 reservoirs of antibiotic resistance. *Front Microbiol* 2015; **6**: 1216.
- 688 15. Fox RE, Zhong X, Krone SM, Top EM. Spatial structure and nutrients promote  
689 invasion of IncP-1 plasmids in bacterial populations. *ISME J* 2008; **2**: 1024–  
690 1039.
- 691 16. Licht TR, Christensen BB, Krogfelt KA, Molin S. Plasmid transfer in the animal  
692 intestine and other dynamic bacterial populations: The role of community  
693 structure and environment. *Microbiology* 1999; **145**: 2615–2622.
- 694 17. Ruan C, Ramoneda J, Gogia G, Wang G, Johnson DR. Fungal hyphae  
695 regulate bacterial diversity and plasmid-mediated functional novelty during  
696 range expansion. *Curr Biol* 2022; **32**: 5285-5294.
- 697 18. Ma Y, Kan A, Johnson DR. Metabolic interactions control the spread of



- 698 plasmid-encoded functional novelty during microbial range expansion. *bioRxiv*  
699 2022; 2022.06.07.495077.
- 700 19. Hallatschek O, Hersen P, Ramanathan S, Nelson DR. Genetic drift at  
701 expanding frontiers promotes gene segregation. *Proc Natl Acad Sci* 2007; **104**:  
702 19926–19930.
- 703 20. Hallatschek O, Hersen P, Ramanathan S, Nelson DR. Genetic drift at  
704 expanding frontiers promotes gene segregation. *Proc Natl Acad Sci* 2007; **104**:  
705 19926–19930.
- 706 21. Goldschmidt F, Caduff L, Johnson DR. Causes and consequences of pattern  
707 diversification in a spatially self-organizing microbial community. *ISME J* 2021;  
708 **15**: 2415–2426.
- 709 22. Estrela S, Brown SP. Community interactions and spatial structure shape  
710 selection on antibiotic resistant lineages. *PLOS Comput Biol* 2018; **14**:  
711 e1006179.
- 712 23. Hyun JK, Boedicker JQ, Jang WC, Ismagilov RF. Defined spatial structure  
713 stabilizes a synthetic multispecies bacterial community. *Proc Natl Acad Sci*  
714 2008; **105**: 18188–18193.
- 715 24. Tecon R, Ebrahimi A, Kleyer H, Levi SE, Or D. Cell-to-cell bacterial  
716 interactions promoted by drier conditions on soil surfaces. *Proc Natl Acad Sci*  
717 2018; **115**: 9791–9796.
- 718 25. Krone SM, Lu R, Fox R, Suzuki H, Top EM. Modelling the spatial dynamics of  
719 plasmid transfer and persistence. *Microbiology* 2007; **153**: 2803.
- 720 26. Bakkeren E, Huisman JS, Fattinger SA, Hausmann A, Furter M, Egli A, et al.  
721 *Salmonella* persisters promote the spread of antibiotic resistance plasmids in  
722 the gut. *Nature* 2019; **573**: 276–280.
- 723 27. Miller ET, Bohannan BJM. Life Between Patches: Incorporating microbiome  
724 biology alters the predictions of metacommunity models. *Front Ecol Evol* 2019;  
725 **7**: 276.
- 726 28. Miller ET, Svanbäck R, Bohannan BJM. Microbiomes as metacommunities:  
727 understanding host-associated microbes through metacommunity ecology.  
728 *Trends Ecol Evol* 2018; **33**: 926–935.
- 729 29. Li B, Qiu Y, Zhang J, Huang X, Shi H, Yin H. Real-time study of rapid spread  
730 of antibiotic resistance plasmid in biofilm using microfluidics. *Environ Sci*  
731 *Technol* 2018; **52**: 11132–11141.
- 732 30. Christensen BB, Sternberg C, Molin S. Bacterial plasmid conjugation on semi-  
733 solid surfaces monitored with the green fluorescent protein (GFP) from  
734 *Aequorea victoria* as a marker. *Gene* 1996; **173**: 59–65.
- 735 31. Buret AG, Motta JP, Allain T, Ferraz J, Wallace JL. Pathobiont release from  
736 dysbiotic gut microbiota biofilms in intestinal inflammatory diseases: a role for  
737 iron? *J Biomed Sci* 2019; **26**: 1–14.
- 738 32. De Weirdt R, Van De Wiele T. Micromanagement in the gut:  
739 microenvironmental factors govern colon mucosal biofilm structure and  
740 functionality. *npj Biofilms Microbiomes* 2015; **1**: 1–6.
- 741 33. Neil K, Allard N, Rodrigue S. Molecular mechanisms influencing bacterial

- 742 conjugation in the intestinal microbiota. *Front Microbiol* 2021; **12**: 1415.
- 743 34. Wake N, Asahi Y, Noiri Y, Hayashi M, Motooka D, Nakamura S, et al.
- 744 Temporal dynamics of bacterial microbiota in the human oral cavity determined
- 745 using an in situ model of dental biofilms. *npj Biofilms Microbiomes* 2016; **2**: 1–
- 746 9.
- 747 35. Jakubovics NS, Goodman SD, Mashburn-Warren L, Stafford GP, Cieplik F.
- 748 The dental plaque biofilm matrix. *Periodontol* 2021; **86**: 32–56.
- 749 36. Karami N, Martner A, Enne VI, Swerkersson S, Adlerberth I, Wold AE.
- 750 Transfer of an ampicillin resistance gene between two *Escherichia coli* strains
- 751 in the bowel microbiota of an infant treated with antibiotics. *J Antimicrob*
- 752 *Chemother* 2007; **60**: 1142–1145.
- 753 37. Goren MG, Carmeli Y, Schwaber MJ, Chmelnitsky I, Schechner V, Navon-
- 754 Venezia S. Transfer of carbapenem-resistant plasmid from *Klebsiella*
- 755 *pneumoniae* ST258 to *Escherichia coli* in patient. *Emerg Infect Dis* 2010; **16**:
- 756 1014.
- 757 38. Rudge TJ, Steiner PJ, Phillips A, Haseloff J. Computational modeling of
- 758 synthetic microbial biofilms. *ACS Synth Biol* 2012; **1**: 345–352.
- 759 39. Wein T, Hülter NF, Mizrahi I, Dagan T. Emergence of plasmid stability under
- 760 non-selective conditions maintains antibiotic resistance. *Nat Commun* 2019;
- 761 **10**: 1–13.
- 762 40. Million-Weaver S, Camps M. Mechanisms of plasmid segregation: Have
- 763 multicopy plasmids been overlooked? *Plasmid* 2014; **75**: 27–36.
- 764 41. Vogwill T, Maclean RC. The genetic basis of the fitness costs of antimicrobial
- 765 resistance: a meta-analysis approach. *Evol Appl* 2015; **8**: 284–295.
- 766 42. Lopatkin AJ, Meredith HR, Srimani JK, Pfeiffer C, Durrett R, You L.
- 767 Persistence and reversal of plasmid-mediated antibiotic resistance. *Nat*
- 768 *Commun* 2017; **8**: 1–10.
- 769 43. Porse A, Gumpert H, Kubicek-Sutherland JZ, Karami N, Adlerberth I, Wold AE,
- 770 et al. Genome dynamics of *Escherichia coli* during antibiotic treatment:
- 771 Transfer, loss, and persistence of genetic elements in situ of the infant gut.
- 772 *Front Cell Infect Microbiol* 2017; **7**: 126.
- 773 44. Alderliesten JB, Duxbury SJN, Zwart MP, De Visser JAGM, Stegeman A,
- 774 Fischer EAJ. Effect of donor-recipient relatedness on the plasmid conjugation
- 775 frequency: A meta-analysis. *BMC Microbiol* 2020; **20**: 1–10.
- 776 45. Stecher B, Denzler R, Maier L, Bernet F, Sanders MJ, Pickard DJ, et al. Gut
- 777 inflammation can boost horizontal gene transfer between pathogenic and
- 778 commensal Enterobacteriaceae. *Proc Natl Acad Sci* 2012; **109**: 1269–1274.
- 779 46. Bakkeren E, Herter JA, Huisman JS, Steiger Y, Gül E, Mark Newson JP, et al.
- 780 Pathogen invasion-dependent tissue reservoirs and plasmid-encoded antibiotic
- 781 degradation boost plasmid spread in the gut. *Elife* 2021; **10**.
- 782 47. Seoane J, Yankelevich T, Dechesne A, Merkey B, Sternberg C, Smets BF. An
- 783 individual-based approach to explain plasmid invasion in bacterial populations.
- 784 *FEMS Microbiol Ecol* 2011; **75**: 17–27.
- 785 48. Martín-Rodríguez AJ. Respiration-induced biofilm formation as a driver for

- 786 bacterial niche colonization. *Trends Microbiol* 2023; **31**: 120–134.
- 787 49. Asally M, Kittisopikul M, Rué P, Du Y, Hu Z, Çağatay T, et al. Localized cell  
788 death focuses mechanical forces during 3D patterning in a biofilm. *Proc Natl  
789 Acad Sci* 2012; **109**: 18891–18896.
- 790 50. Hart SP, Usinowicz J, Levine JM. The spatial scales of species coexistence.  
791 *Nat Ecol Evol* 2017; **1**: 1066–1073.
- 792 51. Hall JPJ, Wood AJ, Harrison E, Brockhurst MA. Source-sink plasmid transfer  
793 dynamics maintain gene mobility in soil bacterial communities. *Proc Natl Acad  
794 Sci* 2016; **113**: 8260–8265.
- 795 52. Bellanger X, Guilloteau H, Breuil B, Merlin C. Natural microbial communities  
796 supporting the transfer of the IncP-1 $\beta$  plasmid pB10 exhibit a higher initial  
797 content of plasmids from the same incompatibility group. *Front Microbiol* 2014;  
798 **5**: 637.
- 799 53. Harvey J, Keenan KP, Gilmour A. Assessing biofilm formation by *Listeria*  
800 *monocytogenes* strains. *Food Microbiol* 2007; **24**: 380–392.
- 801 54. Virolle C, Goldlust K, Djermoun S, Bigot S, Lesterlin C. Plasmid transfer by  
802 conjugation in gram-negative bacteria: from the cellular to the community level.  
803 *Genes* 2020; **11**: 1239.
- 804 55. Be'er A, Zhang HP, Florin EL, Payne SM, Ben-Jacob E, Swinney HL. Deadly  
805 competition between sibling bacterial colonies. *Proc Natl Acad Sci* 2009; **106**:  
806 428–433.
- 807 56. Lilja EE, Johnson DR. Metabolite toxicity determines the pace of molecular  
808 evolution within microbial populations. *BMC Evol Biol* 2017; **17**: 1–12.
- 809 57. Lilja EE, Johnson DR. Segregating metabolic processes into different microbial  
810 cells accelerates the consumption of inhibitory substrates. *ISME J* 2016; **10**:  
811 1568–1578.
- 812 58. Reisner A, Molin S, Zechner EL. Recombinogenic engineering of conjugative  
813 plasmids with fluorescent marker cassettes. *FEMS Microbiol Ecol* 2002; **42**:  
814 251–259.
- 815 59. Grant SGN, Jessee J, Bloom FR, Hanahan D. Differential plasmid rescue from  
816 transgenic mouse DNAs into *Escherichia coli* methylation-restriction mutants.  
817 *Proc Natl Acad Sci* 1990; **87**: 4645–4649.
- 818 60. Ferreira TA, Blackman A V., Oyrer J, Jayabal S, Chung AJ, Watt AJ, et al.  
819 Neuronal morphometry directly from bitmap images. *Nat Methods* 2014; **11**:  
820 982–984.
- 821 61. Taheri-Araghi S, Bradde S, Sauls JT, Hill NS, Levin PA, Paulsson J, et al. Cell-  
822 size control and homeostasis in bacteria. *Curr Biol* 2015; **25**: 385–391.
- 823 62. Benz F, Huisman JS, Bakkeren E, Herter JA, Stadler T, Ackermann M, et al.  
824 Plasmid- and strain-specific factors drive variation in ESBL-plasmid spread in  
825 vitro and *in vivo*. *ISME J* 2020; **15**: 862–878.
- 826 63. Lau BTC, Malkus P, Paulsson J. New quantitative methods for measuring  
827 plasmid loss rates reveal unexpected stability. *Plasmid* 2013; **70**: 353–361.
- 828 64. Korolev KS, Müller MJ, Karahan N, Murray AW, Hallatschek O, Nelson DR.  
829 Selective sweeps in growing microbial colonies. *Phys Biol* 2012; **9**: 026008.

830 **Supplementary materials**

831

832

833 **Supplementary Table 1. Specifications of the strains and plasmid used in this study.**

834

| Strain                                | Relevant characteristics                                                                                | Reference |
|---------------------------------------|---------------------------------------------------------------------------------------------------------|-----------|
| <i>P. stutzeri</i> A1601- <i>egfp</i> | A1501 with $\Delta comA$ and mini-Tn7T-LAC-Gm- <i>egfp</i> ; Gm <sup>R</sup> , <i>egfp</i> <sup>+</sup> | [56, 57]  |
| <i>P. stutzeri</i> A1601- <i>ech</i>  | A1501 with $\Delta comA$ and mini-Tn7T-LAC-Gm- <i>ech</i> ; Gm <sup>R</sup> , <i>ech</i> <sup>+</sup>   | [56, 57]  |
| <i>E. coli</i> DH5 $\alpha$           | F2 <i>supE44 lacU169 (w80lacZDM15) hsdR17 recA1 endA1 gyrA96thi-1 r elA1</i>                            | [59]      |
| pAR145ecfp                            | pSU2007 <i>aph::cat</i> -PA1/04/03- <i>cfp</i> <sup>-</sup> -T0                                         | [58]      |
